# Supplementary material for: Co(ii)–Cu(ii) mixed-oxide catalysts for single-step synthesis of 2,4,5-triaryl-1H-imidazole derivatives under microwave irradiation
Source: Royal Society of Chemistry journal article supplement (doi:10.1039/d4dt01631a), 2024-01-01

## Co(II)-Cu(II) Mixed Oxide Catalyst for Single Step Synthesis of 2,4,5-Triaryle-1H-Imidazole Derivatives Under Microwave Irradiation

Manohar K. Jopale<sup>a,i</sup>, Zhiyong Zheng<sup>b</sup>, Soowon Choi<sup>b</sup>, Bharat N. Shelke<sup>c,i</sup>, Nilesh Mharsale<sup>a</sup>, Shripad Patil<sup>d</sup>, Sonali S. Chine<sup>e</sup>, Vilas Gade<sup>f</sup>, Shital V. Kahane<sup>g</sup>, Ravindra N. Bulakhe<sup>b\*</sup>, Ji Man Kim<sup>b\*</sup>, Amol H. Kategaonkar<sup>h,i\*</sup>

<sup>a</sup>Department of Chemistry, M.V.P. Samaj's Arts, Commerce & Science College Jawahar Road, Tryambakeshwar, Nashik 422 212, Maharashtra, India

<sup>b</sup>Department of Chemistry, Sungkyunkwan University, Suwon, 16419, Republic of Korea

<sup>c</sup>Department of Chemistry, M.V.P. Samaj's SVKT, Arts, Commerce & Science College, Deolali Camp, Nashik 422 401, Maharashtra, India

<sup>d</sup>Department of Chemistry, Rayat Shikshan Sanstha's, Dada Patil Mahavidyalaya, Karjat, Ahmednagar 414 401 Maharashtra, India

<sup>e</sup>Department of Engineering Sciences. & Humanities, Sanjivani College of Engineering, Kopergaon (S.P.P.U. Pune) Ahmednagar 423 601 Maharashtra, India

<sup>f</sup>Department of Chemistry, Rayat Shikshan Sanstha's, Arts, Science and Commerce College, Mokhada, Palghar 401 604, Maharashtra, India

<sup>g</sup> Dr. Vishwanath Karad MIT World Peace University, Kothrud, Pune

<sup>h</sup>Department of Chemistry, M.V.P. Samaj's K.R.T. Arts, B.H. Commerce and A.M. Science (KTHM) College, Nashik-422 002, Maharashtra, India.

<sup>i</sup>Department of Chemistry, M.V.P. Samaj's G.M.D. Arts, B. W. Commerce & Science College Sinnar, Nashik 422 103, Maharashtra, India

\*Corresponding Author E-mail id: [bulakhe@skku.edu](mailto:bulakhe@skku.edu), [jimankim@skku.edu](mailto:jimankim@skku.edu), [amol.kategaonkar@gmail.com](mailto:amol.kategaonkar@gmail.com)

### FTIR:

FTIR spectrum shown in figure 1, (Model FT/IR- 4600 in solid phase) from 400–4000  $\text{cm}^{-1}$  for synthesized catalyst material. Characterization shows the absorption intensities at 3666, 3445, 1604 and 1399  $\text{cm}^{-1}$  are due to chemisorbed water molecules. Frequency 2929, 2852, 2358 and 2315  $\text{cm}^{-1}$  are due to asymmetric and symmetric stretching of catalyst material, 1017  $\text{cm}^{-1}$  shows stretching vibration of Co=O and Cu=O. The band at 659 and 581  $\text{cm}^{-1}$  are due to Co-O and Cu-O bending vibrations.

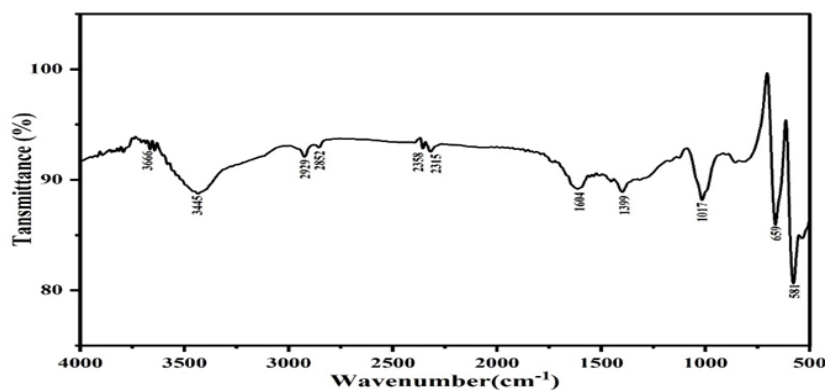

**Figure: 1.** FTIR spectra of Co-Cu oxide mixed composite.

## TOF-MS Spectra:

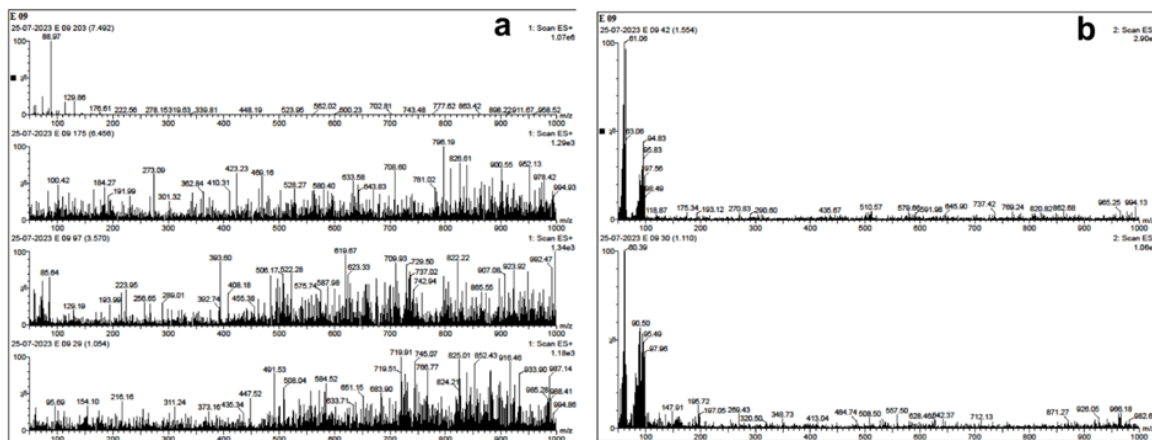

**Figure 2.** TOF MS ES spectra of Co-Cu oxide mixed phase a) TOF MS ES+ b) TOF MS ES-

## Catalyst preparation:

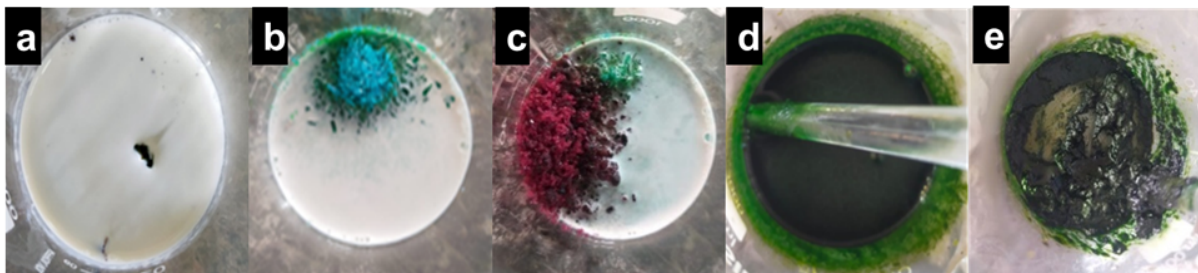

**Figure 3.** Preparation of Co-Cu oxide mixed phase **a.** *Euphorbia neriifolia* latex **b.** Latex +  $\text{CuCl}_2 \cdot 2\text{H}_2\text{O}$  **c.** Latex +  $\text{CuCl}_2 \cdot 2\text{H}_2\text{O}$  +  $\text{CoCl}_2 \cdot 6\text{H}_2\text{O}$  **d.** gel of Co-Cu precursor **e.** sol of Co-Cu precursor

## Spectral Data:

4e. <sup>1</sup>H-NMR spectrum of 2-(4-fluorophenyl)-4,5-diphenyl-1H-imidazole

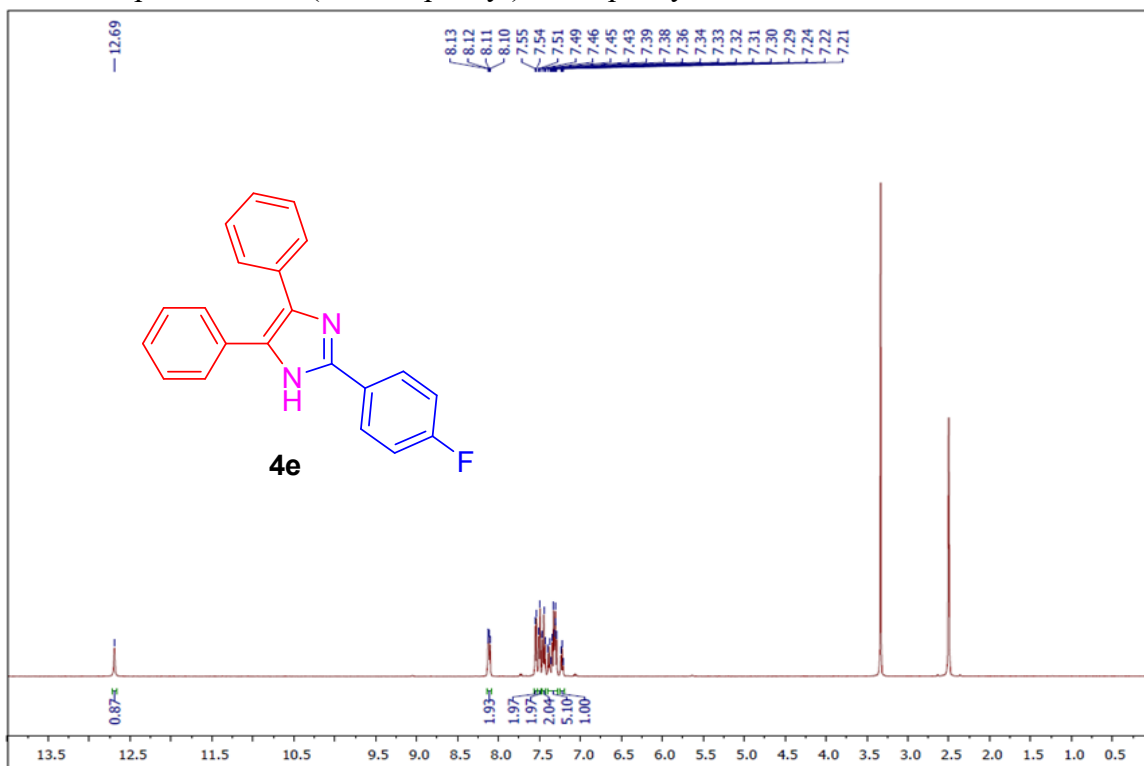

4e. <sup>13</sup>C-NMR spectrum of 2-(4-fluorophenyl)-4,5-diphenyl-1H-imidazole

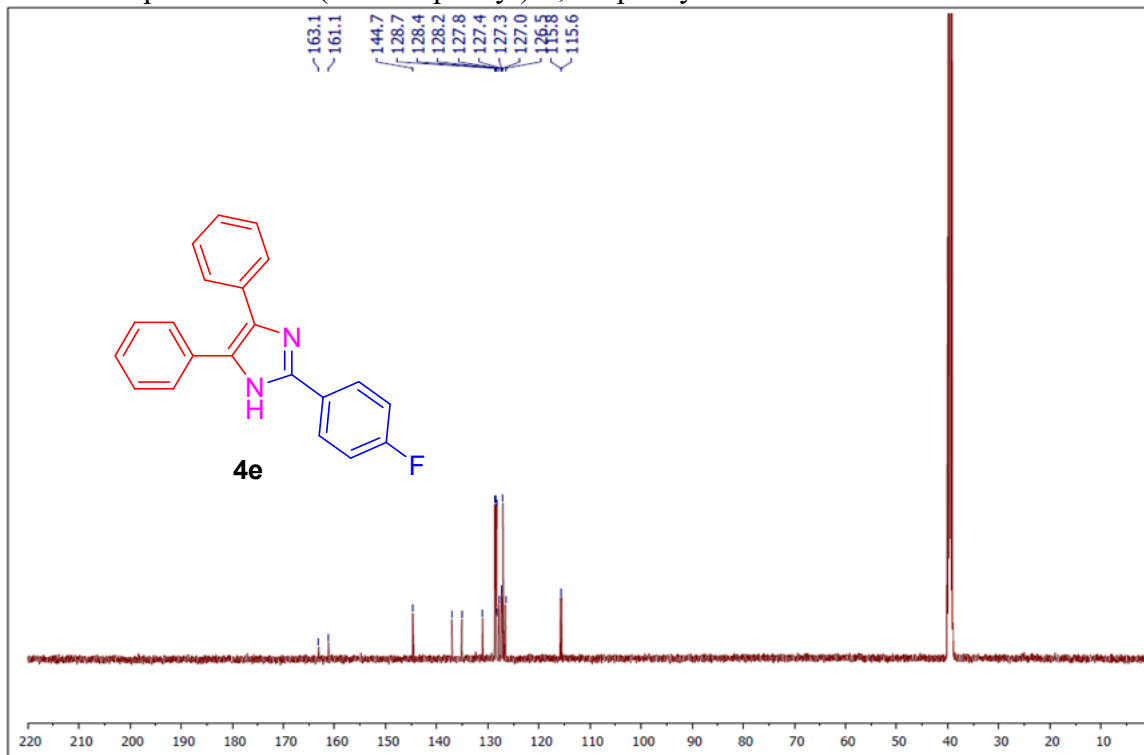

4f. <sup>1</sup>H-NMR spectrum of 2-(2-chlorophenyl)-4,5-diphenyl-1H-imidazole

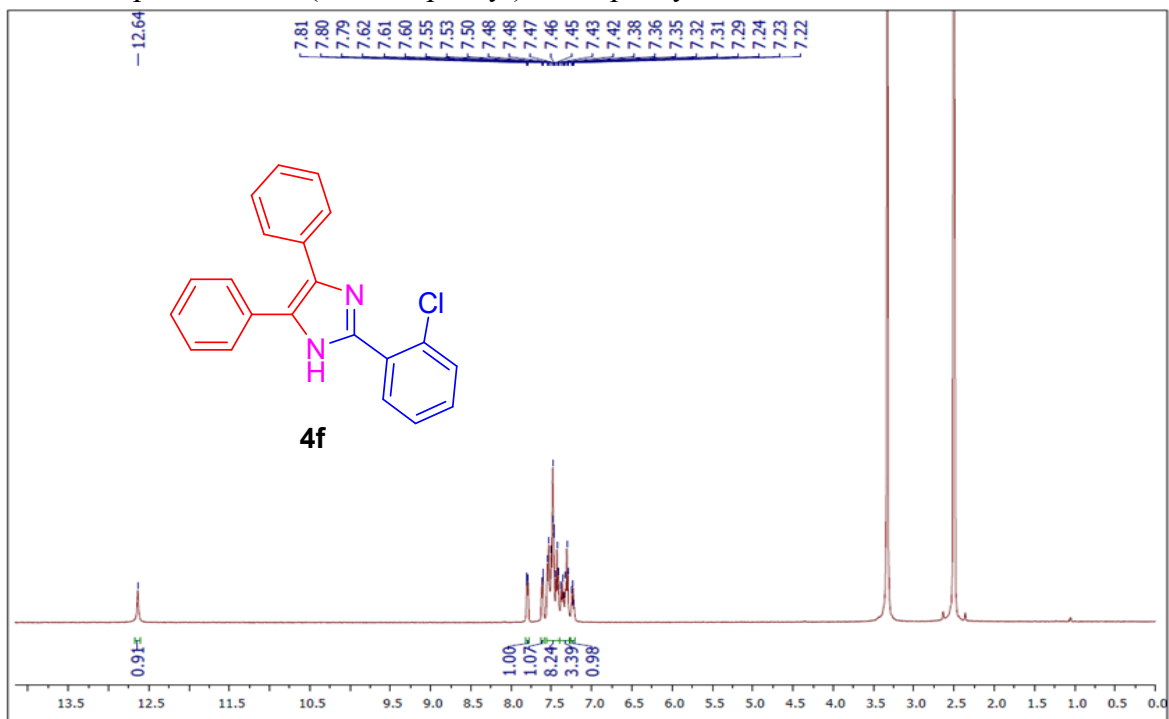

4f. <sup>13</sup>C-NMR spectrum of 2-(2-chlorophenyl)-4,5-diphenyl-1H-imidazole

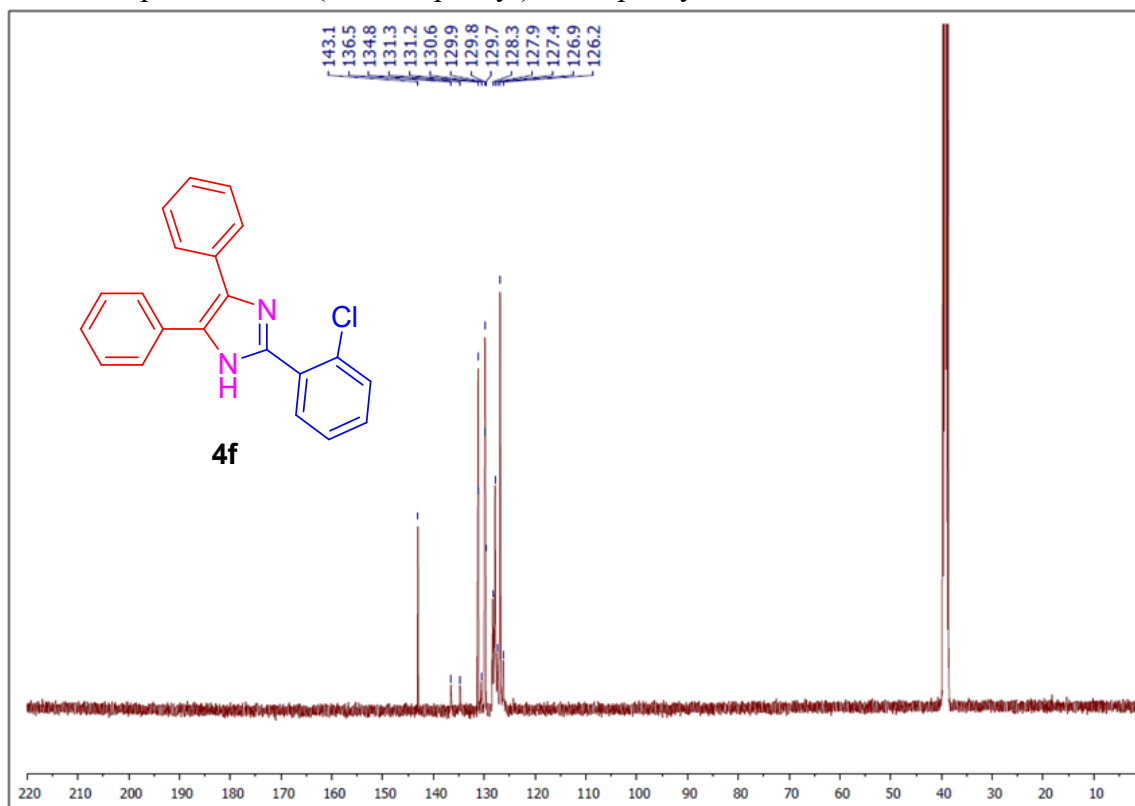

4g. <sup>1</sup>H-NMR spectrum of 2-(4-chlorophenyl)-4,5-diphenyl-1H-imidazole

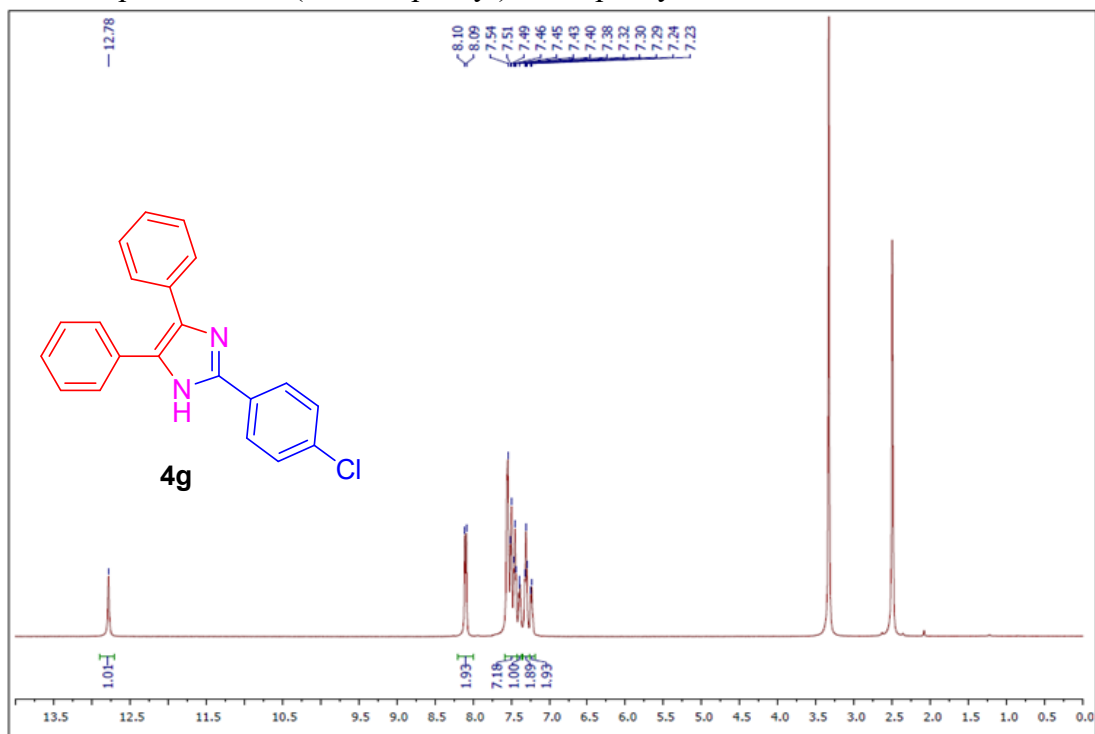

4g. <sup>13</sup>C-NMR spectrum of 2-(4-chlorophenyl)-4,5-diphenyl-1H-imidazole

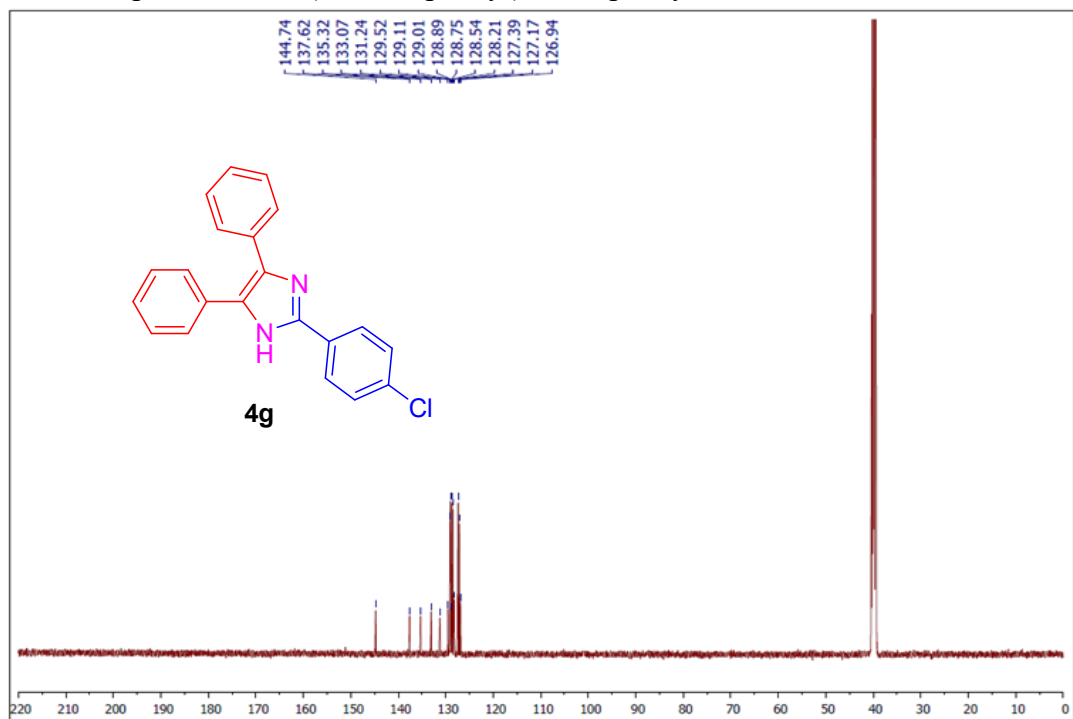

4h. <sup>1</sup>H-NMR spectrum of N,N-dimethyl-4-(4,5-diphenyl-1H-imidazol-2-yl)benzenamine

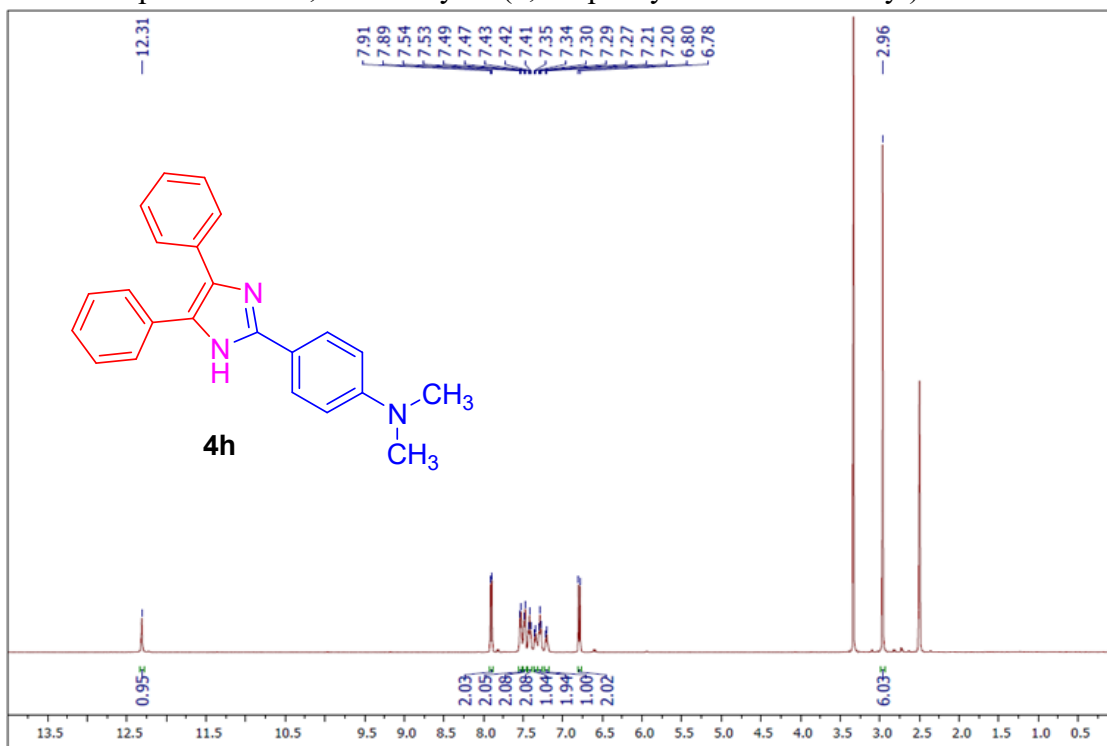

4h. <sup>13</sup>C-NMR spectrum of N,N-dimethyl-4-(4,5-diphenyl-1H-imidazol-2-yl)benzenamine

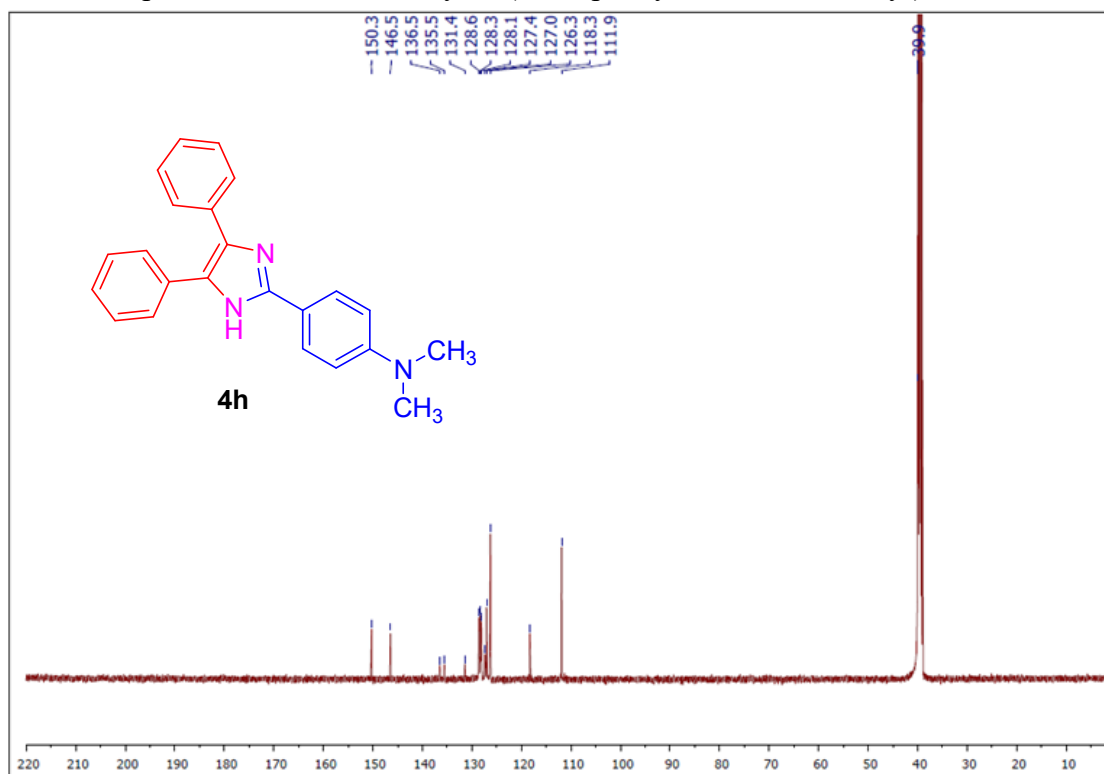

4j.  $^1\text{H-NMR}$  spectrum of 4,5-diphenyl-2-p-tolyl-1H-imidazole

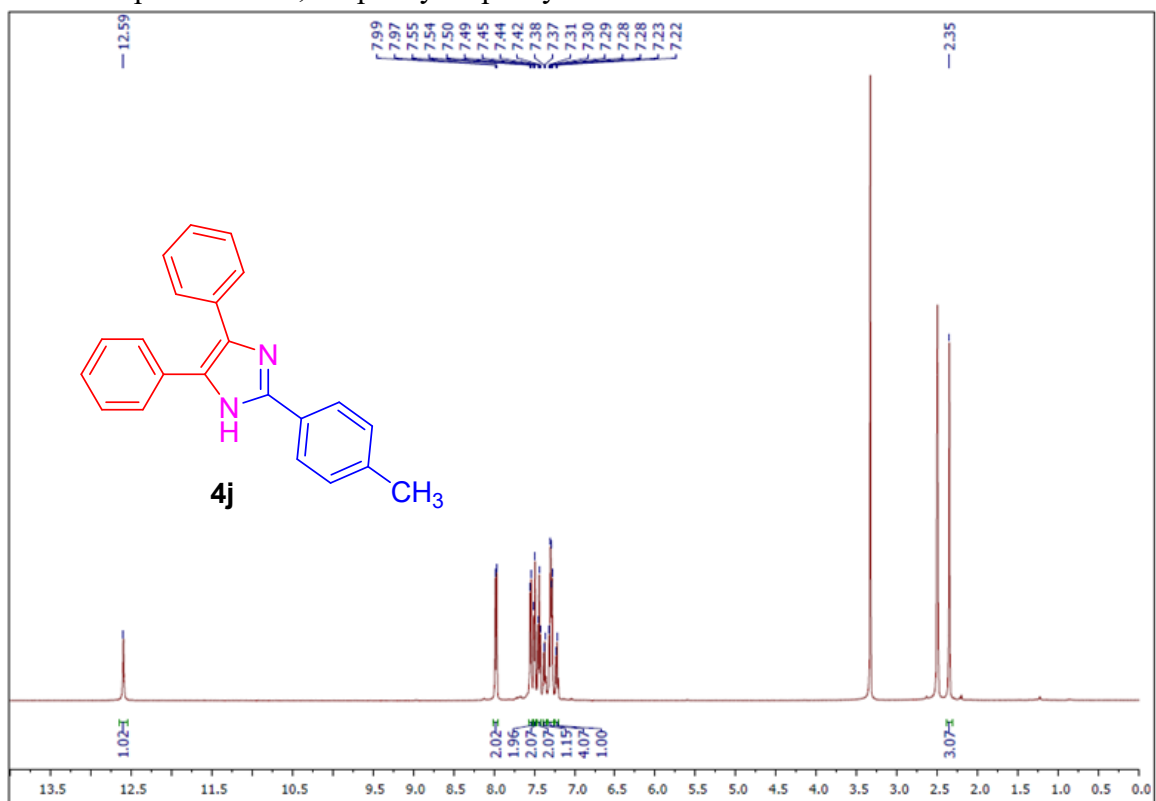

4j.  $^{13}\text{C-NMR}$  spectrum of 4,5-diphenyl-2-p-tolyl-1H-imidazole

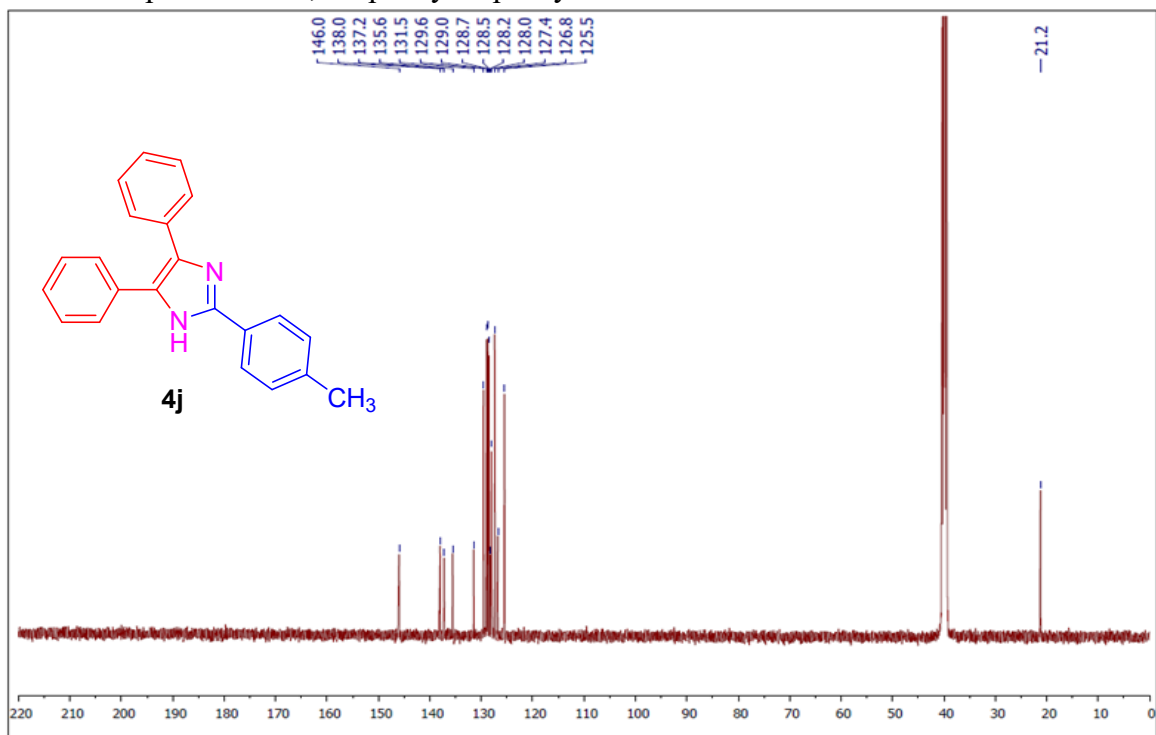

4m.  $^1\text{H-NMR}$  spectrum of 3-(4,5-diphenyl-1H-imidazol-2-yl)-1H-indole

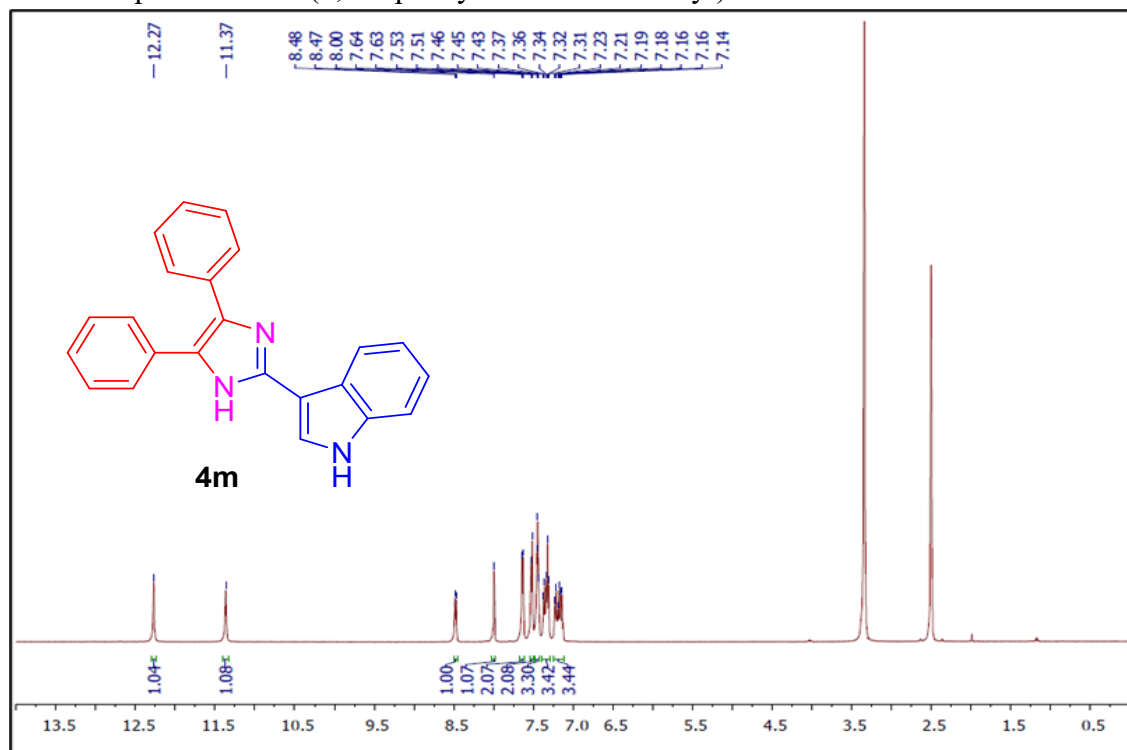

4m.  $^{13}\text{C-NMR}$  spectrum of 3-(4,5-diphenyl-1H-imidazol-2-yl)-1H-indole

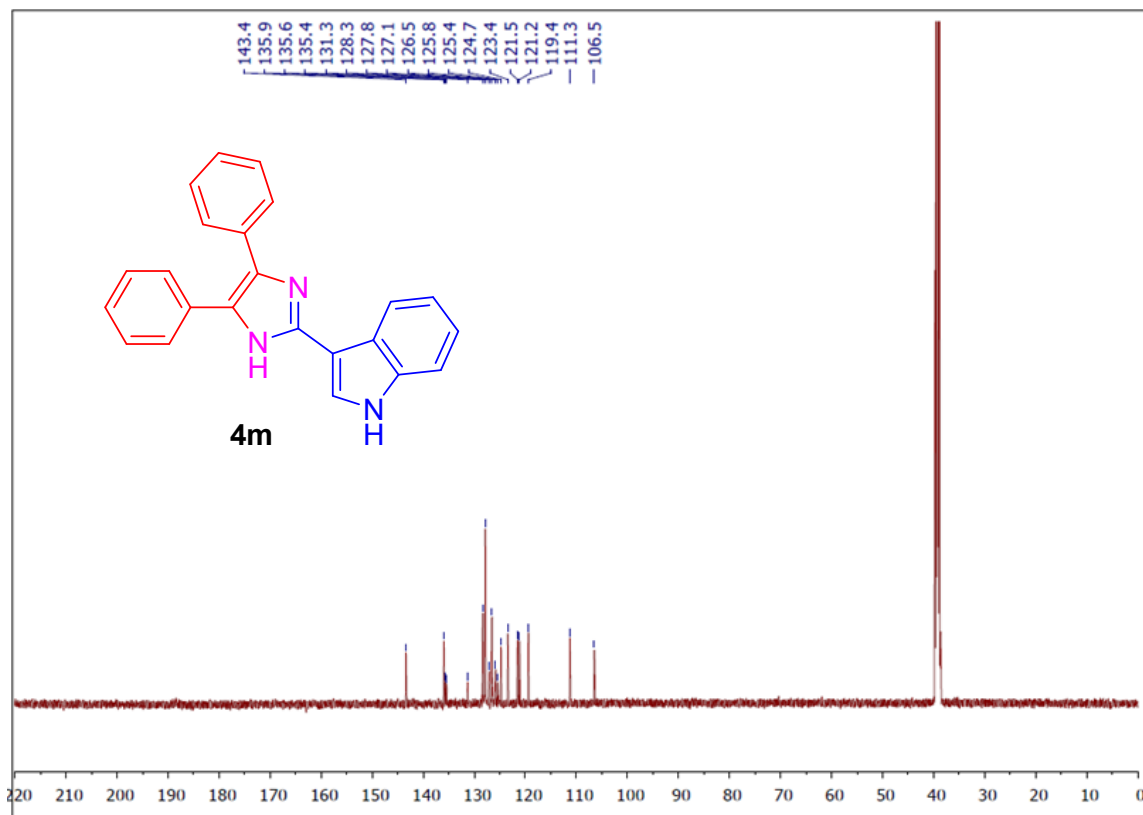



4o. <sup>1</sup>H-NMR spectrum of 4-(4,5-diphenyl-1H-imidazol-2-yl)phenol

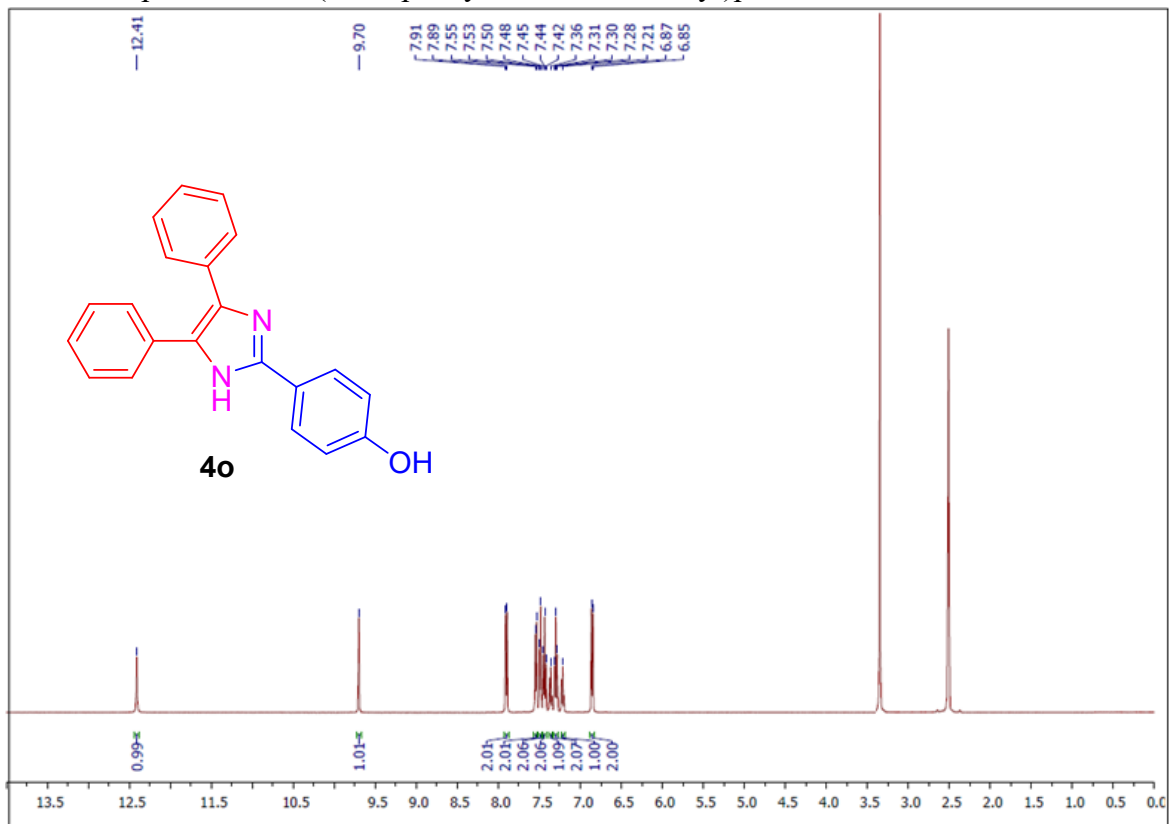

4o. <sup>13</sup>C-NMR spectrum of 4-(4,5-diphenyl-1H-imidazol-2-yl)phenol

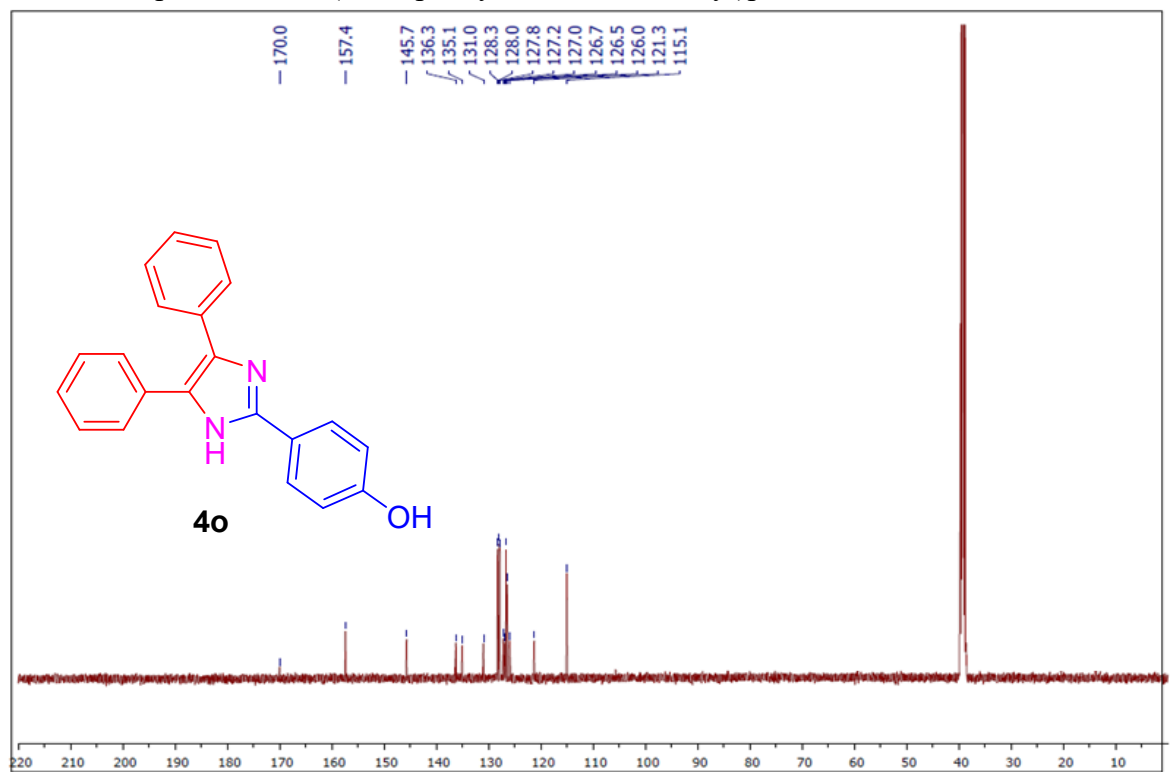

4p.  $^1\text{H-NMR}$  spectrum of 2-(4,5-diphenyl-1H-imidazol-2-yl)pyridine

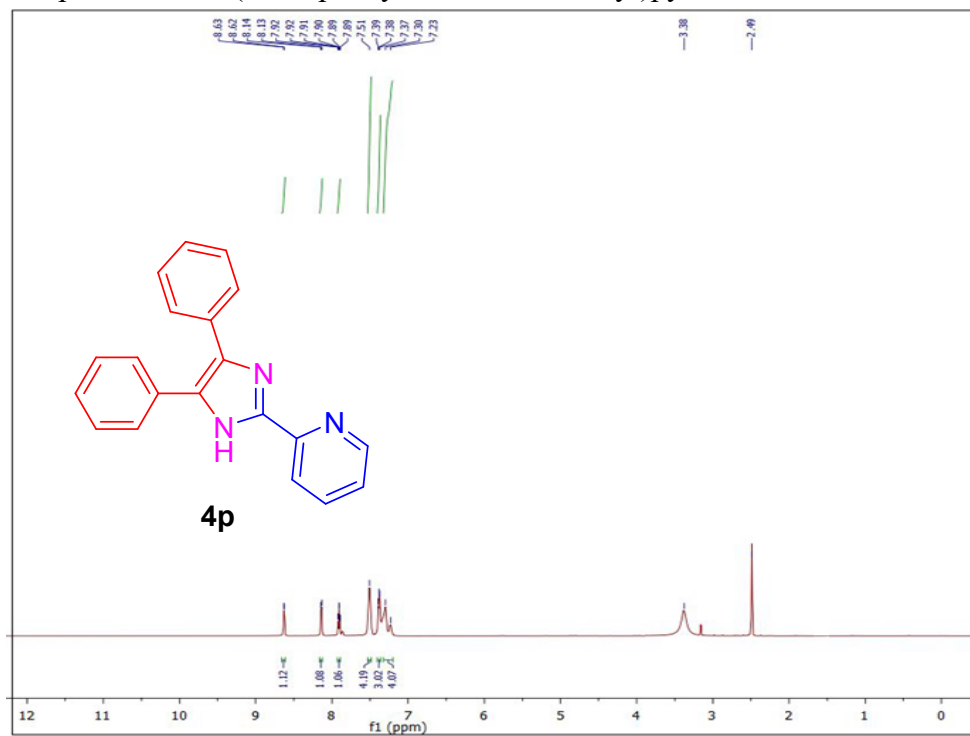

4p.  $^{13}\text{C-NMR}$  spectrum of 2-(4,5-diphenyl-1H-imidazol-2-yl)pyridine

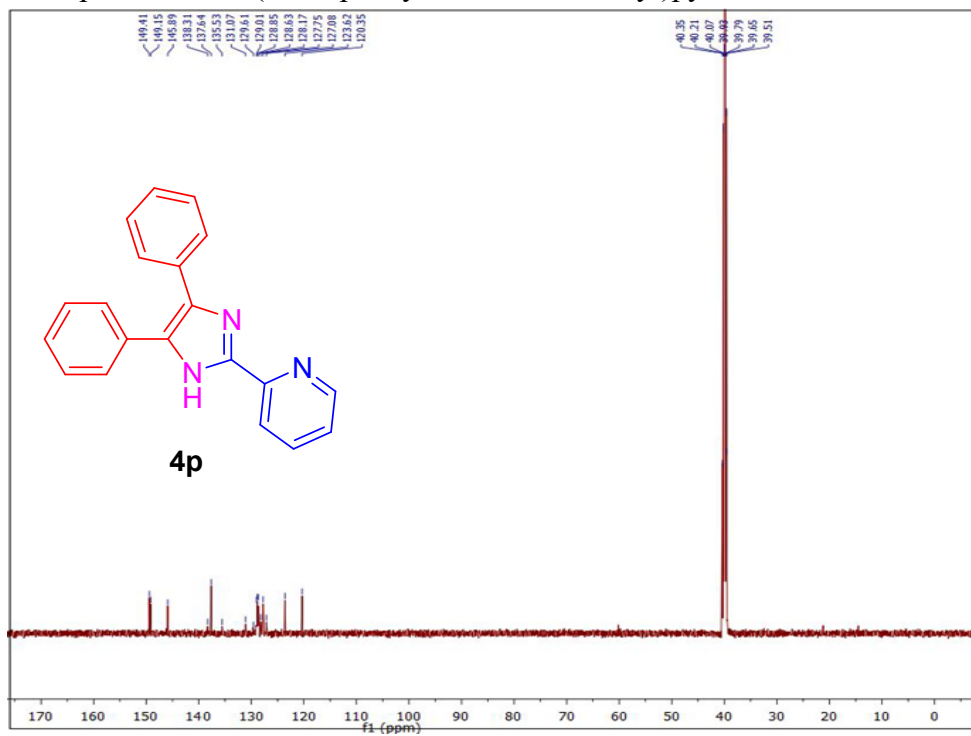

Supplement: d4dt01631a1.pdf [file d4dt01631a1.pdf]
